# Supplementary material for: Magnetic cork composites as biosorbents in dispersive solid-phase extraction of pesticides in water samples
Source: Royal Society of Chemistry journal article supplement (doi:10.1039/d3ay00163f), 2023-01-01
Supplement: d3ay00163f1.pdf [file d3ay00163f1.pdf]

## Supplementary material

### **Magnetic cork composites as biosorbents in dispersive solid-phase extraction of pesticides in water samples**

*Na Hang<sup>a</sup>, Yang Yang<sup>a</sup>, Yuyue Zang<sup>a</sup>, Wanning Zhao<sup>a</sup>, Jing Tao<sup>a</sup>, Songqing Li<sup>a\*</sup>.*

<sup>a</sup>Beijing Key Laboratory for Forest Pest Control, Beijing Forestry University, No. 35

Qinghua East Road, Haidian District, Beijing, 100083, China.

\*Corresponding author: Songqing Li

\*Email: [songqingli@bjfu.edu.cn](mailto:songqingli@bjfu.edu.cn)

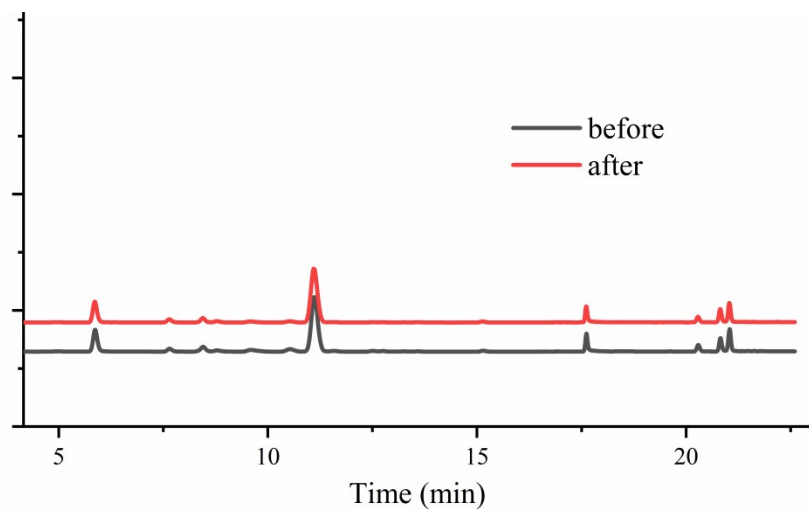

Fig. S1 Comparative chromatograms of magnetic cork composites before and after DSPE procedure

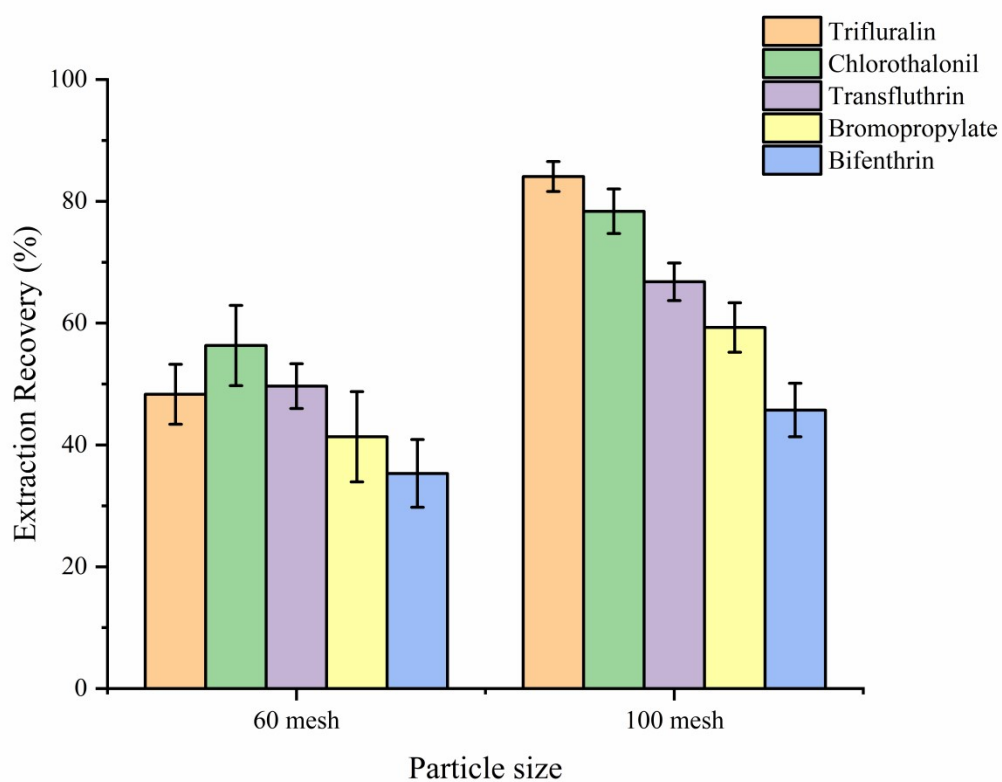

Fig. S2 Comparison of adsorbent particle size on extraction performance

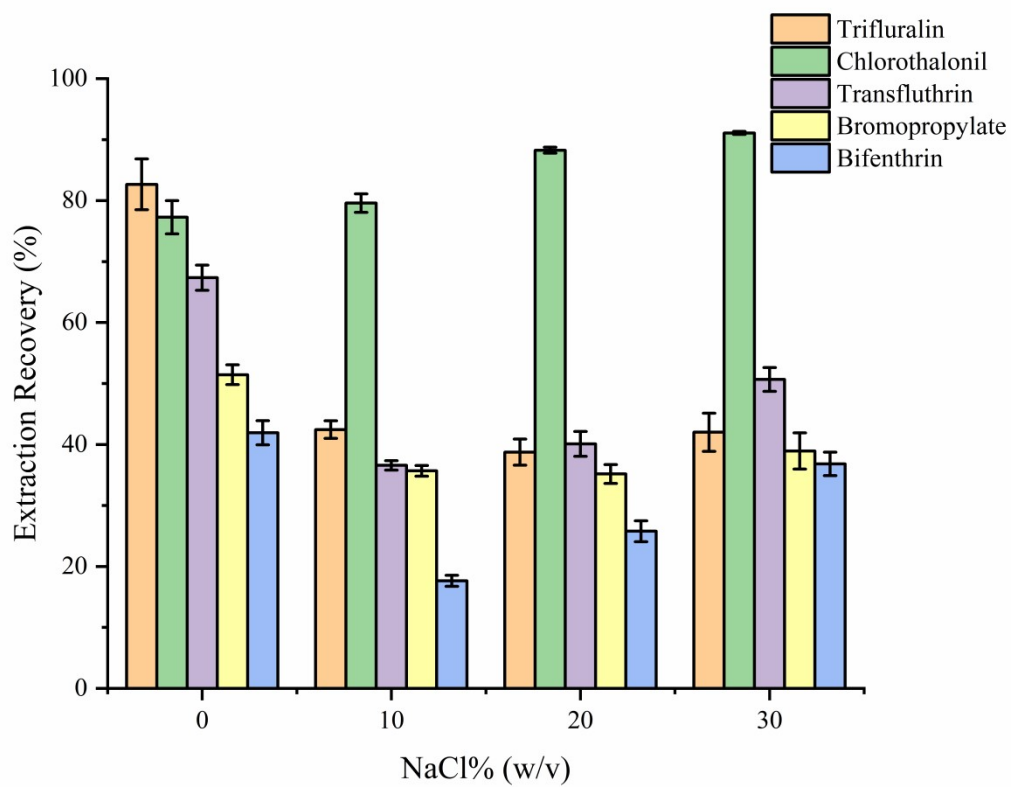

Fig. S3 Effect of the salt optimization on the recovery. Conditions: 5ml sample water, adsorbent quantity 30 mg, extraction time 10min, eluent volume 600  $\mu$ L, pH 7

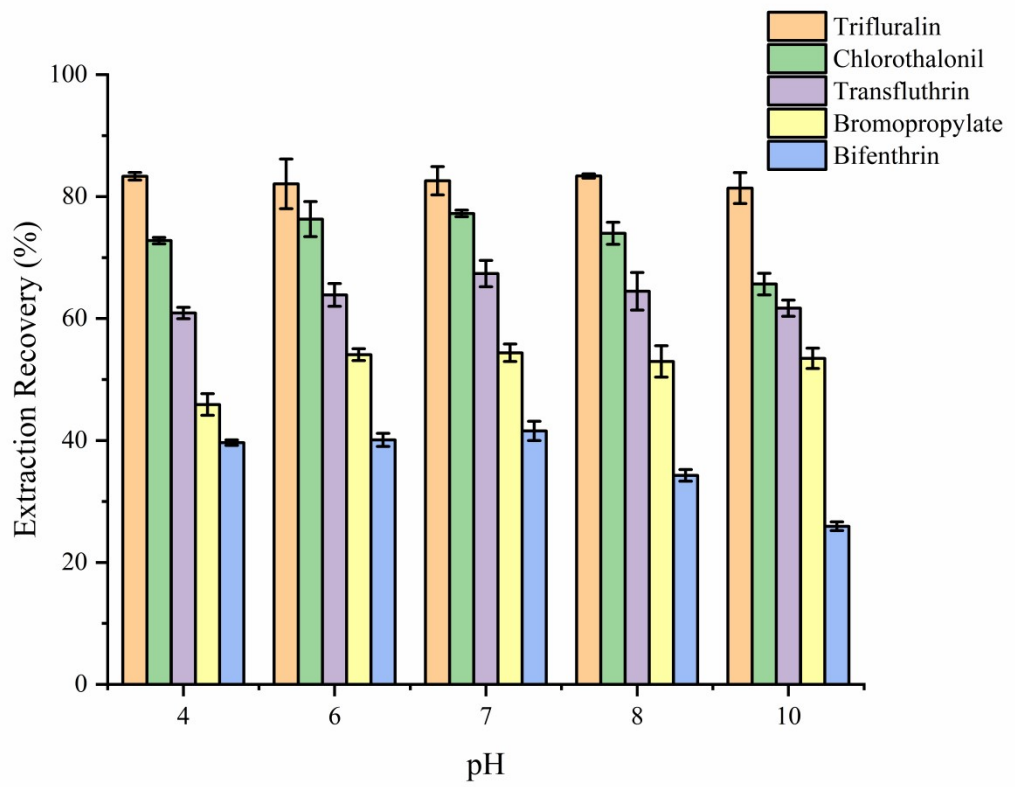

Fig. S4 Effect of the pH on the recovery. Conditions: 5ml sample water, adsorbent quantity 30 mg, extraction time 10min, eluent volume 600  $\mu$ L, no salt added
